# Supplementary material for: Statistical power considerations in genotype-based recall randomized controlled trials
Source: PubMed Central journal article supplement (PMC5122840; doi:10.1038/srep37307), 2016-11-25
Supplement: srep37307-s1.pdf [file srep37307-s1.pdf]

## **Statistical power considerations in genotype-based recall randomized controlled trials**

Naeimeh Atabaki-Pasdar, MSc<sup>1</sup>, Mattias Ohlsson, PhD<sup>2</sup>, Dmitry Shungin, DDS PhD<sup>1</sup>, Azra Kurbasic, PhD<sup>1</sup>, Erik Ingelsson, MD PhD<sup>3</sup>, Ewan R Pearson, FRCP PhD<sup>4</sup>, Ashfaq Ali, PhD<sup>1,¶</sup>, Paul W. Franks, PhD<sup>1,5,6,¶,\*</sup>

<sup>1</sup>Department of Clinical Sciences, Genetic and Molecular Epidemiology Unit, Lund University, Malmö, SE-205 02, Sweden

<sup>2</sup>Department of Astronomy and Theoretical Physics, Computational Biology and Biological Physics Unit, Lund University, Lund, Sweden

<sup>3</sup>Department of Medical Sciences, Molecular Epidemiology, Uppsala University, Uppsala, Sweden

<sup>4</sup> Division of Cardiovascular & Diabetes Medicine, Medical Research Institute, University of Dundee, Dundee, UK

<sup>5</sup> Department of Public Health & Clinical Medicine, Umeå University, Umeå, Sweden

<sup>6</sup> Department of Nutrition, Harvard School of Public Health, Boston, MA, USA.

¶These authors contributed equally to this work

\*Corresponding author

Address: Department of Clinical Sciences, Genetic and Molecular Epidemiology Unit, CRC, Building 91, Level 10, Jan Waldenströms gata 35, Skåne University Hospital Malmö, Lund University, SE-205 02, Malmö, Sweden

Tel: +4640391149; Fax: +4640391222;

E-mail: Paul.Franks@med.lu.se

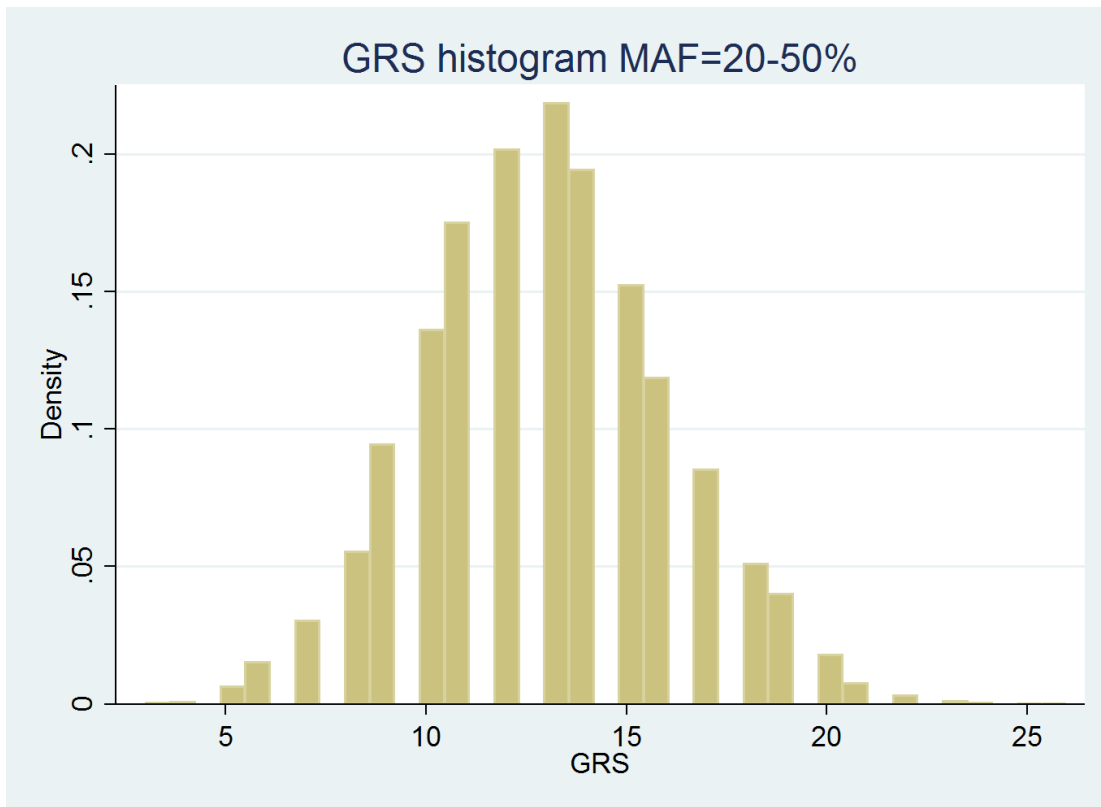

Supplementary Figure 1: Histogram of a GRS effect allele frequency distribution for 20 uncorrelated, randomly selected SNPs (minor allele frequency of 0.20-0.50) in 6,064 participants from GLACIER Study cohort

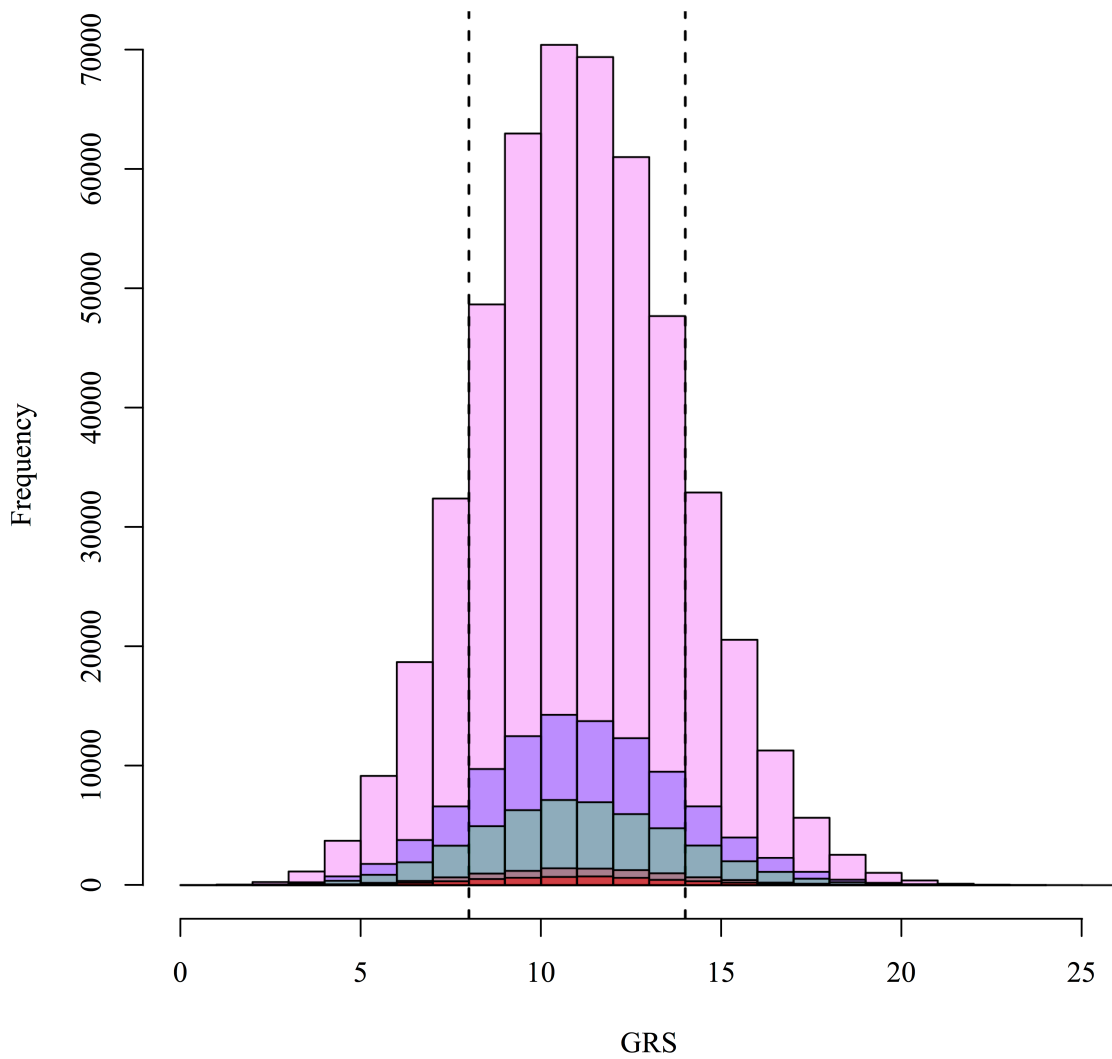

Supplementary Figure 2: Histograms of simulated GRS effect allele frequency distributions for different initial sampling-frames. The x axis indicates the GRS values and the y axis indicates allele frequencies.

|                                     | Figure 1 | Figure 2-A                                                                                                                  | Figure 2-B                                                                                                                  | Figure 2-C                                                                                                                  | Figure 2-D                                                                                                                  |
|-------------------------------------|----------|-----------------------------------------------------------------------------------------------------------------------------|-----------------------------------------------------------------------------------------------------------------------------|-----------------------------------------------------------------------------------------------------------------------------|-----------------------------------------------------------------------------------------------------------------------------|
| Significance Level                  | 0.05     | 0.05                                                                                                                        | 0.05                                                                                                                        | 0.05                                                                                                                        | 0.05                                                                                                                        |
| Treatment Frequency                 | 0.5      | 0.5                                                                                                                         | 0.5                                                                                                                         | 0.5                                                                                                                         | 0.5                                                                                                                         |
| Effect Size for Treatment           | -0.5     | -0.5                                                                                                                        | -0.5                                                                                                                        | -0.5                                                                                                                        | -0.5                                                                                                                        |
| Lowest Sample Size                  | 500      | 300                                                                                                                         | 200                                                                                                                         | 200                                                                                                                         | 500                                                                                                                         |
| Highest Sample Size                 | 3500     | 700                                                                                                                         | 2600                                                                                                                        | 1200                                                                                                                        | 5000                                                                                                                        |
| Sample integer Size                 | 500      | 50                                                                                                                          | 300                                                                                                                         | 100                                                                                                                         | 500                                                                                                                         |
| Population Sample Frame             | 31000    | 10000                                                                                                                       | 10000                                                                                                                       | 10000                                                                                                                       | 10000                                                                                                                       |
| Interaction Effect Size for SNPs    | -0.4     | 0.17,0.30,0.22,<br>0.27,0.21,0.23,<br>0.18,0.17,0.27,<br>0.18,0.21,0.15,<br>0.28,0.28,0.30,<br>0.30,0.24,0.19,<br>0.25,0.23 | 0.06,0.11,0.06,<br>0.06,0.07,0.11,<br>0.05,0.08,0.05,<br>0.11,0.08,0.13,<br>0.07,0.13,0.07,<br>0.10,0.10,0.05,<br>0.07,0.13 | 0.17,0.30,0.22,<br>0.27,0.21,0.23,<br>0.18,0.17,0.27,<br>0.18,0.21,0.15,<br>0.28,0.28,0.30,<br>0.30,0.24,0.19,<br>0.25,0.23 | 0.06,0.11,0.06,<br>0.06,0.07,0.11,<br>0.05,0.08,0.05,<br>0.11,0.08,0.13,<br>0.07,0.13,0.07,<br>0.10,0.10,0.05,<br>0.07,0.13 |
| Main Effect size for SNPs           | 1        | 0.46,0.34,0.40,<br>0.42,0.46,0.13,<br>0.33,0.33,0.48,<br>0.18,0.29,0.11,<br>0.42,0.25,0.33,<br>0.20,0.40,0.38,<br>0.40,0.42 | 0.34,0.10,0.25,<br>0.39,0.27,0.19,<br>0.46,0.33,0.49,<br>0.16,0.31,0.40,<br>0.49,0.26,0.26,<br>0.35,0.38,0.38,<br>0.16,0.46 | 0.46,0.34,0.40,<br>0.42,0.46,0.13,<br>0.33,0.33,0.48,<br>0.18,0.29,0.11,<br>0.42,0.25,0.33,<br>0.20,0.40,0.38,<br>0.40,0.42 | 0.34,0.10,0.25,<br>0.39,0.27,0.19,<br>0.46,0.33,0.49,<br>0.16,0.31,0.40,<br>0.49,0.26,0.26,<br>0.35,0.38,0.38,<br>0.16,0.46 |
| Minor Allele Frequencies of SNPs    | 0.44     | 0.43,0.39,0.27,<br>0.37,0.27,0.28,<br>0.49,0.46,0.28,<br>0.37,0.47,0.23,<br>0.36,0.27,0.38,<br>0.42,0.40,0.25,<br>0.27,0.22 | 0.43,0.39,0.27,<br>0.37,0.27,0.28,<br>0.49,0.46,0.28,<br>0.37,0.47,0.23,<br>0.36,0.27,0.38,<br>0.42,0.40,0.25,<br>0.27,0.22 | 0.16,0.15,0.05,<br>0.20,0.13,0.13,<br>0.11,0.16,0.10,<br>0.18,0.16,0.13,<br>0.07,0.09,0.10,<br>0.15,0.15,0.20,<br>0.10,0.15 | 0.16,0.15,0.05,<br>0.20,0.13,0.13,<br>0.11,0.16,0.10,<br>0.18,0.16,0.13,<br>0.07,0.09,0.10,<br>0.15,0.15,0.20,<br>0.10,0.15 |
| Type of survival time distributions | Weibull  | Gompertz                                                                                                                    | Gompertz                                                                                                                    | Gompertz                                                                                                                    | Gompertz                                                                                                                    |
| Mean for Time to Event              | 2.165    | 2.165                                                                                                                       | 2.165                                                                                                                       | 2.165                                                                                                                       | 2.165                                                                                                                       |
| Variance for Time to Event          | 1.24     | 1.242                                                                                                                       | 1.242                                                                                                                       | 1.242                                                                                                                       | 1.24                                                                                                                        |
| End point for the study             | 4        | 4                                                                                                                           | 4                                                                                                                           | 4                                                                                                                           | 4                                                                                                                           |
| Frequency of Event                  | 0.376    | 0.16                                                                                                                        | 0.16                                                                                                                        | 0.16                                                                                                                        | 0.16                                                                                                                        |

Supplementary table 1: Parameters used in the simulations shown in the Figure1 and Figure 2 for Cox Regression Model (SNP).

|                                        | <b>Figure 3</b> |
|----------------------------------------|-----------------|
| <b>Significance Level</b>              | 0.05            |
| <b>Treatment Frequency</b>             | 0.5             |
| <b>Effect Size for Treatment</b>       | -1.84           |
| <b>Lowest Sample Size</b>              | 200             |
| <b>Highest Sample Size</b>             | 2000            |
| <b>Sample integer Size</b>             | 200             |
| <b>Population Sample Frame</b>         | 31000           |
| <b>Value for Intercept</b>             | 767             |
| <b>Residual Standard Error</b>         | 0.75            |
| <b>Interaction Effect Size for GRS</b> | 0.03            |
| <b>Main Effect size for GRS</b>        | 0.66            |
| <b>Mean for GRS</b>                    | 36.9            |
| <b>Standard deviation for GRS</b>      | 3.22            |

Supplementary table 2: Parameters used in the simulations shown in the Figure3 for Linear Regression Model (GRS).

|                                  | Figure 4-A                                                                                                                           | Figure 4-B                                                                                                                           | Figure 4-C                                                                                                                  | Figure 4-D                                                                                                                  |
|----------------------------------|--------------------------------------------------------------------------------------------------------------------------------------|--------------------------------------------------------------------------------------------------------------------------------------|-----------------------------------------------------------------------------------------------------------------------------|-----------------------------------------------------------------------------------------------------------------------------|
| Significance Level               | 0.05                                                                                                                                 | 0.05                                                                                                                                 | 0.05                                                                                                                        | 0.05                                                                                                                        |
| Treatment Frequency              | 0.5                                                                                                                                  | 0.5                                                                                                                                  | 0.5                                                                                                                         | 0.5                                                                                                                         |
| Effect Size for Treatment        | -0.2                                                                                                                                 | -0.2                                                                                                                                 | -0.2                                                                                                                        | -0.2                                                                                                                        |
| Lowest Sample Size               | 50                                                                                                                                   | 400                                                                                                                                  | 50                                                                                                                          | 400                                                                                                                         |
| Highest Sample Size              | 500                                                                                                                                  | 2000                                                                                                                                 | 500                                                                                                                         | 2000                                                                                                                        |
| Sample integer Size              | 50                                                                                                                                   | 200                                                                                                                                  | 50                                                                                                                          | 200                                                                                                                         |
| Population Sample Frame          | 10000                                                                                                                                | 10000                                                                                                                                | 10000                                                                                                                       | 10000                                                                                                                       |
| Interaction Effect Size for SNPs | 0.20,0.26,0.26,<br>0.25,0.20,0.25,<br>0.21,0.27,0.16,<br>0.23,0.30,0.15,<br>0.20,0.17,0.15,<br>0.30,0.29,0.29,<br>0.25,0.23          | 0.06,0.08,0.07,<br>0.08,0.05,0.13,<br>0.06,0.13,0.06,<br>0.14,0.12,0.12,<br>0.15,0.08,0.10,<br>0.12,0.10,0.09,<br>0.09,0.07          | 0.20,0.26,0.26,<br>0.25,0.20,0.25,<br>0.21,0.27,0.16,<br>0.23,0.30,0.15,<br>0.20,0.17,0.15,<br>0.30,0.29,0.29,<br>0.25,0.23 | 0.06,0.08,0.07,<br>0.08,0.05,0.13,<br>0.06,0.13,0.06,<br>0.14,0.12,0.12,<br>0.15,0.08,0.10,<br>0.12,0.10,0.09,<br>0.09,0.07 |
| Main Effect size for SNPs        | 0.20,0.23,0.29,<br>0.33,0.33,0.32,<br>0.35,0.23,0.24,<br>0.29,0.33,0.24,<br>0.20,0.31,0.32,<br>0.21,0.24,0.31,<br>0.28,0.25          | 0.09,0.18,0.09,<br>0.07,0.18,0.17,<br>0.12,0.17,0.08,<br>0.08,0.15,0.06,<br>0.18,0.14,0.15,<br>0.07,0.07,0.13,<br>0.06,0.08          | 0.20,0.23,0.29,<br>0.33,0.33,0.32,<br>0.35,0.23,0.24,<br>0.29,0.33,0.24,<br>0.20,0.31,0.32,<br>0.21,0.24,0.31,<br>0.28,0.25 | 0.09,0.18,0.09,<br>0.07,0.18,0.17,<br>0.12,0.17,0.08,<br>0.08,0.15,0.06,<br>0.18,0.14,0.15,<br>0.07,0.07,0.13,<br>0.06,0.08 |
| Minor Allele Frequencies of SNPs | 0.50,0.28,0.36,<br>0.43,0.48,0.47,<br>0.43, 0.29, 0.30,<br>0.20, 0.46, 0.50,<br>0.24, 0.29, 0.33,<br>0.36, 0.49, 0.46,<br>0.23, 0.29 | 0.50,0.28,0.36,<br>0.43,0.48,0.47,<br>0.43, 0.29, 0.30,<br>0.20, 0.46, 0.50,<br>0.24, 0.29, 0.33,<br>0.36, 0.49, 0.46,<br>0.23, 0.29 | 0.06,0.19,0.06,<br>0.13,0.06,0.17,<br>0.20,0.12,0.05,<br>0.15,0.16,0.16,<br>0.08,0.12,0.19,<br>0.20,0.17,0.08,<br>0.06,0.15 | 0.06,0.19,0.06,<br>0.13,0.06,0.17,<br>0.20,0.12,0.05,<br>0.15,0.16,0.16,<br>0.08,0.12,0.19,<br>0.20,0.17,0.08,<br>0.06,0.15 |
| Value for Intercept              | 1                                                                                                                                    | 1                                                                                                                                    | 1                                                                                                                           | 1                                                                                                                           |
| Residual Standard Error          | 3.47                                                                                                                                 | 3.47                                                                                                                                 | 3.47                                                                                                                        | 3.47                                                                                                                        |

Supplementary table 3: Parameters used in the simulations shown in the Figure4 for Linear Regression Model (SNP)

|                                     | Figure 5-AB Red                                                                                     | Figure 5-AB Orange                                                                                  | Figure 5-AB Green                                                                                   | Figure 5-AB Blue                                                                                    | Figure 5-AB Purple                                                                                  |
|-------------------------------------|-----------------------------------------------------------------------------------------------------|-----------------------------------------------------------------------------------------------------|-----------------------------------------------------------------------------------------------------|-----------------------------------------------------------------------------------------------------|-----------------------------------------------------------------------------------------------------|
| Significance Level                  | 0.05                                                                                                | 0.05                                                                                                | 0.05                                                                                                | 0.05                                                                                                | 0.05                                                                                                |
| Treatment Frequency                 | 0.5                                                                                                 | 0.5                                                                                                 | 0.5                                                                                                 | 0.5                                                                                                 | 0.5                                                                                                 |
| Effect Size for Treatment           | -0.5                                                                                                | -0.5                                                                                                | -0.5                                                                                                | -0.5                                                                                                | -0.5                                                                                                |
| Lowest Sample Size                  | 200                                                                                                 | 200                                                                                                 | 200                                                                                                 | 200                                                                                                 | 200                                                                                                 |
| Highest Sample Size                 | 2200                                                                                                | 2200                                                                                                | 2200                                                                                                | 2200                                                                                                | 2200                                                                                                |
| Sample integer Size                 | 200                                                                                                 | 200                                                                                                 | 200                                                                                                 | 200                                                                                                 | 200                                                                                                 |
| Population Sample Frame             | 5000                                                                                                | 10000                                                                                               | 50000                                                                                               | 100000                                                                                              | 500000                                                                                              |
| Interaction Effect Size for SNPs    | 0.06,0.09,0.06,0.13,0.05,0.13,0.08,0.10,0.08,0.09,0.13,0.12,0.08,0.14,0.08,0.07,0.06,0.07,0.11,0.05 | 0.06,0.09,0.06,0.13,0.05,0.13,0.08,0.10,0.08,0.09,0.13,0.12,0.08,0.14,0.08,0.07,0.06,0.07,0.11,0.05 | 0.06,0.09,0.06,0.13,0.05,0.13,0.08,0.10,0.08,0.09,0.13,0.12,0.08,0.14,0.08,0.07,0.06,0.07,0.11,0.05 | 0.06,0.09,0.06,0.13,0.05,0.13,0.08,0.10,0.08,0.09,0.13,0.12,0.08,0.14,0.08,0.07,0.06,0.07,0.11,0.05 | 0.06,0.09,0.06,0.13,0.05,0.13,0.08,0.10,0.08,0.09,0.13,0.12,0.08,0.14,0.08,0.07,0.06,0.07,0.11,0.05 |
| Main Effect size for SNPs           | 0.24,0.42,0.42,0.39,0.26,0.10,0.47,0.44,0.36,0.18,0.35,0.39,0.46,0.49,0.24,0.37,0.39,0.17,0.46,0.35 | 0.24,0.42,0.42,0.39,0.26,0.10,0.47,0.44,0.36,0.18,0.35,0.39,0.46,0.49,0.24,0.37,0.39,0.17,0.46,0.35 | 0.24,0.42,0.42,0.39,0.26,0.10,0.47,0.44,0.36,0.18,0.35,0.39,0.46,0.49,0.24,0.37,0.39,0.17,0.46,0.35 | 0.24,0.42,0.42,0.39,0.26,0.10,0.47,0.44,0.36,0.18,0.35,0.39,0.46,0.49,0.24,0.37,0.39,0.17,0.46,0.35 | 0.24,0.42,0.42,0.39,0.26,0.10,0.47,0.44,0.36,0.18,0.35,0.39,0.46,0.49,0.24,0.37,0.39,0.17,0.46,0.35 |
| Minor Allele Frequencies of SNPs    | 0.06,0.19,0.06,0.13,0.06,0.17,0.20,0.12,0.05,0.15,0.16,0.16,0.08,0.12,0.19,0.20,0.17,0.08,0.06,0.15 | 0.06,0.19,0.06,0.13,0.06,0.17,0.20,0.12,0.05,0.15,0.16,0.16,0.08,0.12,0.19,0.20,0.17,0.08,0.06,0.15 | 0.06,0.19,0.06,0.13,0.06,0.17,0.20,0.12,0.05,0.15,0.16,0.16,0.08,0.12,0.19,0.20,0.17,0.08,0.06,0.15 | 0.06,0.19,0.06,0.13,0.06,0.17,0.20,0.12,0.05,0.15,0.16,0.16,0.08,0.12,0.19,0.20,0.17,0.08,0.06,0.15 | 0.06,0.19,0.06,0.13,0.06,0.17,0.20,0.12,0.05,0.15,0.16,0.16,0.08,0.12,0.19,0.20,0.17,0.08,0.06,0.15 |
| Type of survival time distributions | Gompertz                                                                                            | Gompertz                                                                                            | Gompertz                                                                                            | Gompertz                                                                                            | Gompertz                                                                                            |
| Mean for Time to Event              | 2.165                                                                                               | 2.165                                                                                               | 2.165                                                                                               | 2.165                                                                                               | 2.165                                                                                               |
| Variance for Time to Event          | 1.242                                                                                               | 1.242                                                                                               | 1.242                                                                                               | 1.24                                                                                                | 1.24                                                                                                |
| End point for the study             | 4                                                                                                   | 4                                                                                                   | 4                                                                                                   | 4                                                                                                   | 4                                                                                                   |
| Frequency of Event                  | 0.16                                                                                                | 0.16                                                                                                | 0.16                                                                                                | 0.16                                                                                                | 0.16                                                                                                |

Supplementary table 4: Parameters used in the simulations shown in the Figure5-AB for Cox Regression Model (SNP)

|                                         | <b>Figure 5-CD<br/>Red</b>                                                                                                  | <b>Figure 5-CD<br/>Orange</b>                                                                                               | <b>Figure 5-CD<br/>Green</b>                                                                                                | <b>Figure 5-CD<br/>Blue</b>                                                                                                 | <b>Figure 5-CD<br/>Purple</b>                                                                                               |
|-----------------------------------------|-----------------------------------------------------------------------------------------------------------------------------|-----------------------------------------------------------------------------------------------------------------------------|-----------------------------------------------------------------------------------------------------------------------------|-----------------------------------------------------------------------------------------------------------------------------|-----------------------------------------------------------------------------------------------------------------------------|
| <b>Significance Level</b>               | 0.05                                                                                                                        | 0.05                                                                                                                        | 0.05                                                                                                                        | 0.05                                                                                                                        | 0.05                                                                                                                        |
| <b>Treatment Frequency</b>              | 0.5                                                                                                                         | 0.5                                                                                                                         | 0.5                                                                                                                         | 0.5                                                                                                                         | 0.5                                                                                                                         |
| <b>Effect Size for Treatment</b>        | -0.2                                                                                                                        | -0.2                                                                                                                        | -0.2                                                                                                                        | -0.2                                                                                                                        | -0.2                                                                                                                        |
| <b>Lowest Sample Size</b>               | 100                                                                                                                         | 100                                                                                                                         | 100                                                                                                                         | 100                                                                                                                         | 100                                                                                                                         |
| <b>Highest Sample Size</b>              | 1000                                                                                                                        | 1000                                                                                                                        | 1000                                                                                                                        | 1000                                                                                                                        | 1000                                                                                                                        |
| <b>Sample integer Size</b>              | 100                                                                                                                         | 100                                                                                                                         | 100                                                                                                                         | 100                                                                                                                         | 100                                                                                                                         |
| <b>Population Sample Frame</b>          | 5000                                                                                                                        | 10000                                                                                                                       | 50000                                                                                                                       | 100000                                                                                                                      | 500000                                                                                                                      |
| <b>Interaction Effect Size for SNPs</b> | 0.06,0.08,0.07,<br>0.08,0.05,0.13,<br>0.06,0.13,0.06,<br>0.14,0.12,0.12,<br>0.15,0.08,0.10,<br>0.12,0.10,0.09,<br>0.09,0.07 | 0.06,0.08,0.07,<br>0.08,0.05,0.13,<br>0.06,0.13,0.06,<br>0.14,0.12,0.12,<br>0.15,0.08,0.10,<br>0.12,0.10,0.09,<br>0.09,0.07 | 0.06,0.08,0.07,<br>0.08,0.05,0.13,<br>0.06,0.13,0.06,<br>0.14,0.12,0.12,<br>0.15,0.08,0.10,<br>0.12,0.10,0.09,<br>0.09,0.07 | 0.06,0.08,0.07,<br>0.08,0.05,0.13,<br>0.06,0.13,0.06,<br>0.14,0.12,0.12,<br>0.15,0.08,0.10,<br>0.12,0.10,0.09,<br>0.09,0.07 | 0.06,0.08,0.07,<br>0.08,0.05,0.13,<br>0.06,0.13,0.06,<br>0.14,0.12,0.12,<br>0.15,0.08,0.10,<br>0.12,0.10,0.09,<br>0.09,0.07 |
| <b>Main Effect size for SNPs</b>        | 0.09,0.18,0.09,<br>0.07,0.18,0.17,<br>0.12,0.17,0.08,<br>0.08,0.15,0.06,<br>0.18,0.14,0.15,<br>0.07,0.07,0.13,<br>0.06,0.08 | 0.09,0.18,0.09,<br>0.07,0.18,0.17,<br>0.12,0.17,0.08,<br>0.08,0.15,0.06,<br>0.18,0.14,0.15,<br>0.07,0.07,0.13,<br>0.06,0.08 | 0.09,0.18,0.09,<br>0.07,0.18,0.17,<br>0.12,0.17,0.08,<br>0.08,0.15,0.06,<br>0.18,0.14,0.15,<br>0.07,0.07,0.13,<br>0.06,0.08 | 0.09,0.18,0.09,<br>0.07,0.18,0.17,<br>0.12,0.17,0.08,<br>0.08,0.15,0.06,<br>0.18,0.14,0.15,<br>0.07,0.07,0.13,<br>0.06,0.08 | 0.09,0.18,0.09,<br>0.07,0.18,0.17,<br>0.12,0.17,0.08,<br>0.08,0.15,0.06,<br>0.18,0.14,0.15,<br>0.07,0.07,0.13,<br>0.06,0.08 |
| <b>Minor Allele Frequencies of SNPs</b> | 0.50,0.28,0.36,<br>0.43,0.48,0.47,<br>0.43,0.29,0.30,<br>0.20,0.46,0.50,<br>0.24,0.29,0.33,<br>0.36,0.49,0.46,<br>0.23,0.29 | 0.50,0.28,0.36,<br>0.43,0.48,0.47,<br>0.43,0.29,0.30,<br>0.20,0.46,0.50,<br>0.24,0.29,0.33,<br>0.36,0.49,0.46,<br>0.23,0.29 | 0.50,0.28,0.36,<br>0.43,0.48,0.47,<br>0.43,0.29,0.30,<br>0.20,0.46,0.50,<br>0.24,0.29,0.33,<br>0.36,0.49,0.46,<br>0.23,0.29 | 0.50,0.28,0.36,<br>0.43,0.48,0.47,<br>0.43,0.29,0.30,<br>0.20,0.46,0.50,<br>0.24,0.29,0.33,<br>0.36,0.49,0.46,<br>0.23,0.29 | 0.50,0.28,0.36,<br>0.43,0.48,0.47,<br>0.43,0.29,0.30,<br>0.20,0.46,0.50,<br>0.24,0.29,0.33,<br>0.36,0.49,0.46,<br>0.23,0.29 |
| <b>Value for Intercept</b>              | 1                                                                                                                           | 1                                                                                                                           | 1                                                                                                                           | 1                                                                                                                           | 1                                                                                                                           |
| <b>Residual Standard Error</b>          | 3.47                                                                                                                        | 3.47                                                                                                                        | 3.47                                                                                                                        | 3.47                                                                                                                        | 3.47                                                                                                                        |

Supplementary table 5: Parameters used in the simulations shown in the Figure5-CD for Linear Regression Model (SNP).



|                                         | <b>Figure 7<br/>Red</b>                                                                                                     | <b>Figure 7<br/>Blue</b>                                                                                                    | <b>Figure 7<br/>Green</b>                                                                                                   |
|-----------------------------------------|-----------------------------------------------------------------------------------------------------------------------------|-----------------------------------------------------------------------------------------------------------------------------|-----------------------------------------------------------------------------------------------------------------------------|
| <b>Significance Level</b>               | 0.05                                                                                                                        | 0.05                                                                                                                        | 0.05                                                                                                                        |
| <b>Treatment Frequency</b>              | 0.5                                                                                                                         | 0.5                                                                                                                         | 0.5                                                                                                                         |
| <b>Effect Size for Treatment</b>        | -0.2                                                                                                                        | -0.2                                                                                                                        | -0.2                                                                                                                        |
| <b>Lowest Sample Size</b>               | 100                                                                                                                         | 100                                                                                                                         | 100                                                                                                                         |
| <b>Highest Sample Size</b>              | 1000                                                                                                                        | 1000                                                                                                                        | 1000                                                                                                                        |
| <b>Sample integer Size</b>              | 100                                                                                                                         | 100                                                                                                                         | 100                                                                                                                         |
| <b>Population Sample Frame</b>          | 10000                                                                                                                       | 10000                                                                                                                       | 10000                                                                                                                       |
| <b>Interaction Effect Size for SNPs</b> | 0.06,0.08,0.07,<br>0.08,0.05,0.13,<br>0.06,0.13,0.06,<br>0.14,0.12,0.12,<br>0.15,0.08,0.10,<br>0.12,0.10,0.09,<br>0.09,0.07 | 0.06,0.08,0.07,<br>0.08,0.05,0.13,<br>0.06,0.13,0.06,<br>0.14,0.12,0.12,<br>0.15,0.08,0.10,<br>0.12,0.10,0.09,<br>0.09,0.07 | 0.06,0.08,0.07,<br>0.08,0.05,0.13,<br>0.06,0.13,0.06,<br>0.14,0.12,0.12,<br>0.15,0.08,0.10,<br>0.12,0.10,0.09,<br>0.09,0.07 |
| <b>Main Effect size for SNPs</b>        | 0.09,0.18,0.09,<br>0.07,0.18,0.17,<br>0.12,0.17,0.08,<br>0.08,0.15,0.06,<br>0.18,0.14,0.15,<br>0.07,0.07,0.13,<br>0.06,0.08 | 0.09,0.18,0.09,<br>0.07,0.18,0.17,<br>0.12,0.17,0.08,<br>0.08,0.15,0.06,<br>0.18,0.14,0.15,<br>0.07,0.07,0.13,<br>0.06,0.08 | 0.09,0.18,0.09,<br>0.07,0.18,0.17,<br>0.12,0.17,0.08,<br>0.08,0.15,0.06,<br>0.18,0.14,0.15,<br>0.07,0.07,0.13,<br>0.06,0.08 |
| <b>Minor Allele Frequencies of SNPs</b> | 0.50,0.28,0.36,<br>0.43,0.48,0.47,<br>0.43,0.29,0.30,<br>0.20,0.46,0.50,<br>0.24,0.29,0.33,<br>0.36,0.49,0.46,<br>0.23,0.29 | 0.50,0.28,0.36,<br>0.43,0.48,0.47,<br>0.43,0.29,0.30,<br>0.20,0.46,0.50,<br>0.24,0.29,0.33,<br>0.36,0.49,0.46,<br>0.23,0.29 | 0.50,0.28,0.36,<br>0.43,0.48,0.47,<br>0.43,0.29,0.30,<br>0.20,0.46,0.50,<br>0.24,0.29,0.33,<br>0.36,0.49,0.46,<br>0.23,0.29 |
| <b>Value for Intercept</b>              | 1                                                                                                                           | 1                                                                                                                           | 1                                                                                                                           |
| <b>Residual Standard Error</b>          | 2.2912                                                                                                                      | 1.333                                                                                                                       | 0.75                                                                                                                        |

Supplementary table 6: Parameters used in the simulations shown in the Figure7 for Linear Regression Model (SNP).
